# Supplementary material for: Refining the friction force through periodically grooved surfaces
Source: Royal Society of Chemistry journal article supplement (doi:10.1039/d5nr01602a), 2025-01-01
Supplement: d5nr01602a1.pdf [file d5nr01602a1.pdf]

## Refining the friction force through periodically grooved surfaces

Zhiyong Wei\*, Dong Han, Qi Wang, Yixiao Lu, Yi Tao, Xi Lu, Shuang Cai\*

Jiangsu Key Laboratory for Design & Manufacture of Micro/Nano Biomedical Instruments and  
School of Mechanical Engineering, Southeast University, Nanjing 211189, People's Republic of  
China

Corresponding authors:

Email: zywei@seu.edu.cn (Z. W.); shuangcai0139@seu.edu.cn (S.C.)

### 1. Effects of normal load on the friction

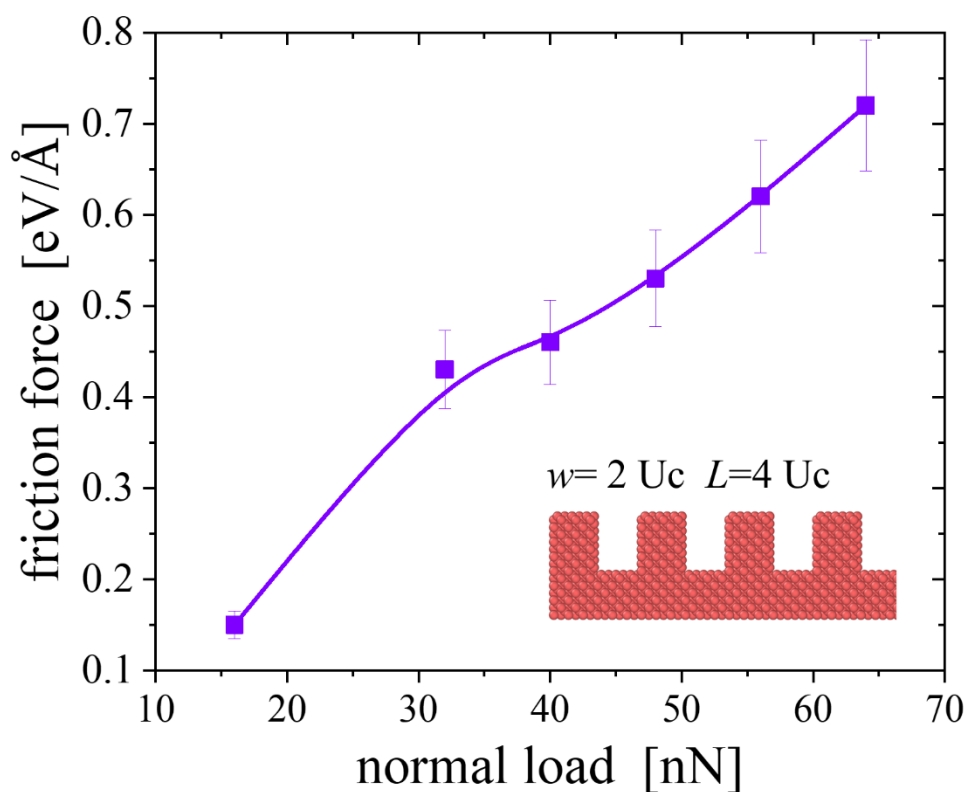

Figure S1. Effects of the normal load on the friction for grooved surface with geometrical parameters of  $w = 2 U_c$  and  $L = 4 U_c$ .

### 2. Surface morphology of the tip before and after the friction tests

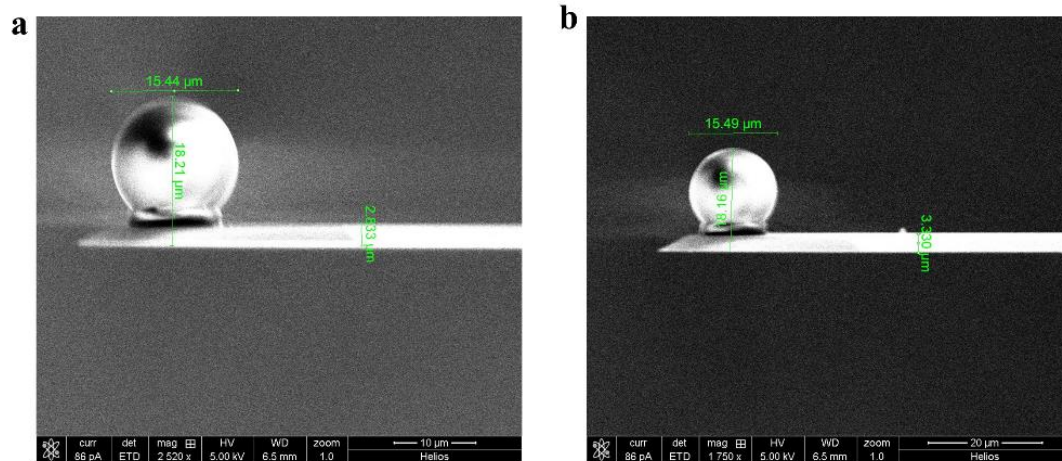

Figure S2. The surface morphology of the probe before (a) and after (b) the friction tests.
